# Supplementary material for: Wnt activated β-catenin and YAP proteins enhance the expression of non-coding RNA component of RNase MRP in colon cancer cells
Source: PubMed Central journal article supplement (PMC4741480; doi:10.18632/oncotarget.5778), 2015-09-22
Supplement: oncotarget-06-34658-s001.pdf [file oncotarget-06-34658-s001.pdf]

**Wnt activated  $\beta$ -catenin and YAP proteins enhance the expression of non-coding RNA component of RNase MRP in colon cancer cells**

**Supplementary Material**

**Supplementary Table 1.** List of RT-PCR primers

| Target           | Type | Sequence                            |
|------------------|------|-------------------------------------|
| <i>RMRP</i>      | For  | 5' – CGTGCTGAAGGCCTGTATCC – 3'      |
|                  | Rev  | 5' – GCTTCTTGGCGGACTTTGG – 3'       |
| $\beta$ -catenin | For  | 5' – CGGGATCCACAAGAAACGGCTTTCA – 3' |
|                  | Rev  | 5' – GAGAATTCAGGTCAGTATCAAACCA – 3' |
| YAP              | For  | 5' – AGCAGGATGGTGGGACTCAA – 3'      |
|                  | Rev  | 5' – TGAGGGCAGGGTGCTTTGG – 3'       |
| TBX5             | For  | 5' – CCAGCCTAGATTACACATCGTG – 3'    |
|                  | Rev  | 5' – TGTGGTTCTGGTAGGAAGTCAC – 3'    |
| TCF4             | For  | 5' – CAAAGACGAGGGCGAACAGG – 3'      |
|                  | Rev  | 5' – TGGAGATAGTTCCGGGCGGT – 3'      |
| Axin-2           | For  | 5' – GCTAC AGGAAGACCCGCAG – 3'      |
|                  | Rev  | 5' – TAGTGGTGG TGGACATGCTTCG – 3'   |
| CTGF             | For  | 5' – AAGACCTGTGGGATGGGCA – 3'       |
|                  | Rev  | 5' – CAACTTGATAGGCTTGGAGATT – 3'    |
| TAZ              | For  | 5' – CACCCACGATGACCCAGA – 3'        |
|                  | Rev  | 5' – GCCAGGTTAGAAAGGGCTCAC – 3'     |
| c-myc            | For  | 5' – AGGCTCCTGGCAAAGGTCA – 3'       |
|                  | Rev  | 5' – ACATTCTCCTCGGTGTCCGA – 3'      |
| hTERT            | For  | 5' – CGTCCAGTGCCAGGGG – 3'          |
|                  | Rev  | 5' – CGTGGGTGAGGTGAGGTGT – 3'       |
| GAPDH            | For  | 5' – TGACATCAAGAAGGTGGTGA – 3'      |
|                  | Rev  | 5' – TCCACCACCCTGTTGCTGTA – 3'      |
| $\beta$ 2M       | For  | 5' – CATCCATCCGACATTGAAGTTG – 3'    |
|                  | Rev  | 5' – ATGGTTCACACGGCAGGCA – 3'       |

**Supplementary Table 2.** List of northern probes

| <b>RNA name</b> | <b>Location (nt)</b> | <b>Length (nt)</b> | <b>Sequence</b>                                                                                                                                                                                                                                                                                        |
|-----------------|----------------------|--------------------|--------------------------------------------------------------------------------------------------------------------------------------------------------------------------------------------------------------------------------------------------------------------------------------------------------|
| <i>RMRP</i>     | 5 - 266              | 262                | CGTGCTGAAGGCCTGTATCCTAGGCTACACA<br>CTGAGGACTCTGTTCCCTCCCCTTTCCGCCTAG<br>GGGAAAGTCCCCGGACCTCGGGCAGAGAGT<br>GCCACGTGCATACGCACGTAGACATTCCCCG<br>CTTCCCCTCCAAAGTCCGCCAAGAAGCGTAT<br>CCCGCTGAGCGGCGTGGCGCGGGGGCGTCA<br>TCCGTCAGCTCCCTCTAGTTACGCAGGCAGT<br>GCGTGTCCGCGCACCAACCACACGGGGCTCA<br>TTCTCAGCGCGGCT |
| 5.8S rRNA       | 2 - 156              | 155                | ACTCTTAGCGGTGGATCACTCGGCTCGTGCG<br>TCGATGAAGAACGCAGCTAGCTGCGAGAATTA<br>ATGTGAATTGCAGGACACATTGATCATCGACA<br>CTTCGAACGCACTTGCGGCCCCCGGGTTCCTC<br>CCGGGGCTACGCCTGTCTGAGCGTCGCTT                                                                                                                           |
| U6 snRNA        | 1 - 106              | 106                | GTGCTCGCTTCGGCAGCACATATACTAAAATT<br>GGAACGATACAGAGAAGATTAGCATGGCCCC<br>TGCGCAAGGATGACACGCAAATTCGTGAAGC<br>GTTCCATATTTT                                                                                                                                                                                 |
| 5S rRNA         | 1 - 120              | 120                | GTCTACGGCCATACCACCCTGAACGCGCCCG<br>ATCTCGTCTGATCTCGGAAGCTAAGCAGGGTC<br>GGGCCTGGTTAGTACTTGGATGGGAGACCGC<br>CTGGGAATACCGGGTGCTGTAGGCTT                                                                                                                                                                   |

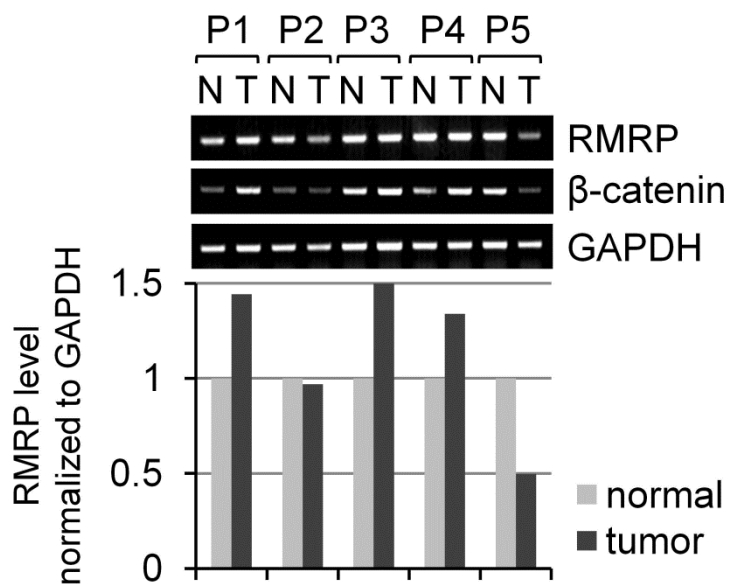

**Supplementary Figure 1. *RMRP* expression in liver cancer patient tissues.**

RT-PCR analysis of *RMRP* expression levels in liver tumor patient tissues. A bar graph shows the relative level in tumor tissues versus normal tissues. P: patient, N: normal tissue, T: tumor tissue.

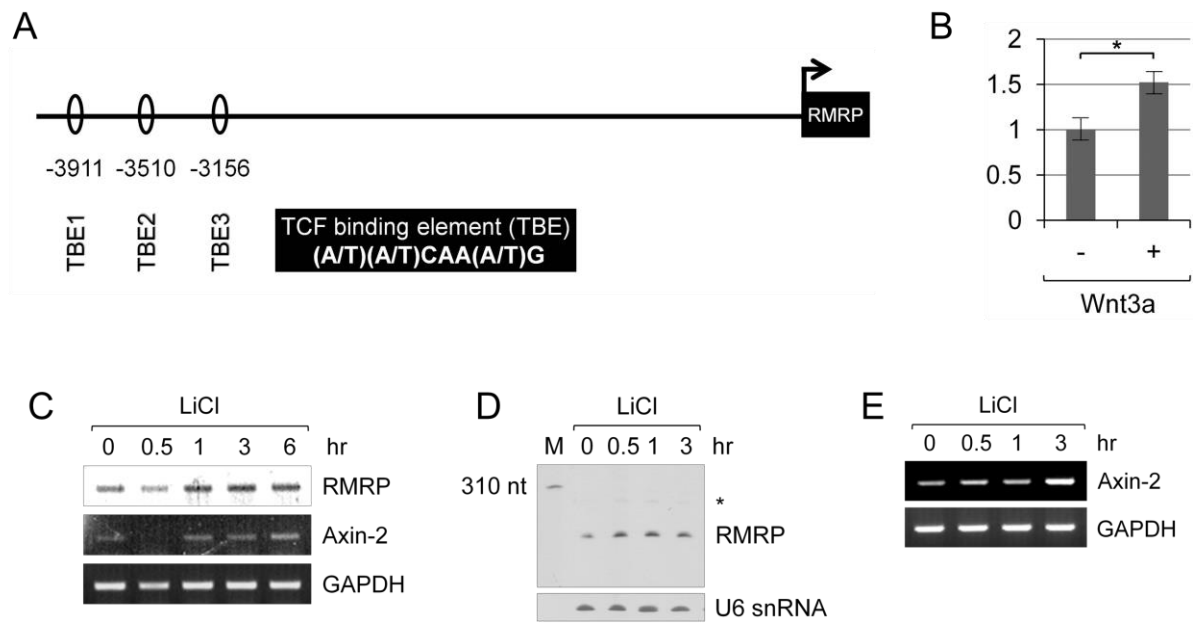

**Supplementary Figure 2. Predicted  $\beta$ -catenin/TCF sites in *RMRP* promoter and Wnt or LiCl activated *RMRP* expression level.**

(A) Diagram of the *RMRP* promoter with three putative TBEs (TCF Binding Elements) upstream of the *RMRP* promoter. An arrow indicates the transcription start site of the *RMRP* gene. (B) Quantitative real-time PCR analysis of *RMRP* level in HEK293 cells following Wnt3a treatment for 1 hour. A bar graph shows *RMRP* level from three independent experiments. Mean and standard deviation is shown ( $*p < 0.01$ ). (C) RT-PCR analysis of *RMRP* expression following lithium chloride (20 mM) treatment for 0, 0.5, 1, 3 and 6 hrs in Beas-2B cells. (D) Northern blot analysis of *RMRP* expression in HEK293 cells following lithium chloride (20 mM) treatment for 0, 0.5, 1 and 3 hrs. (E) RT-PCR analysis of *Axin-2* mRNA expression from the samples of (D).

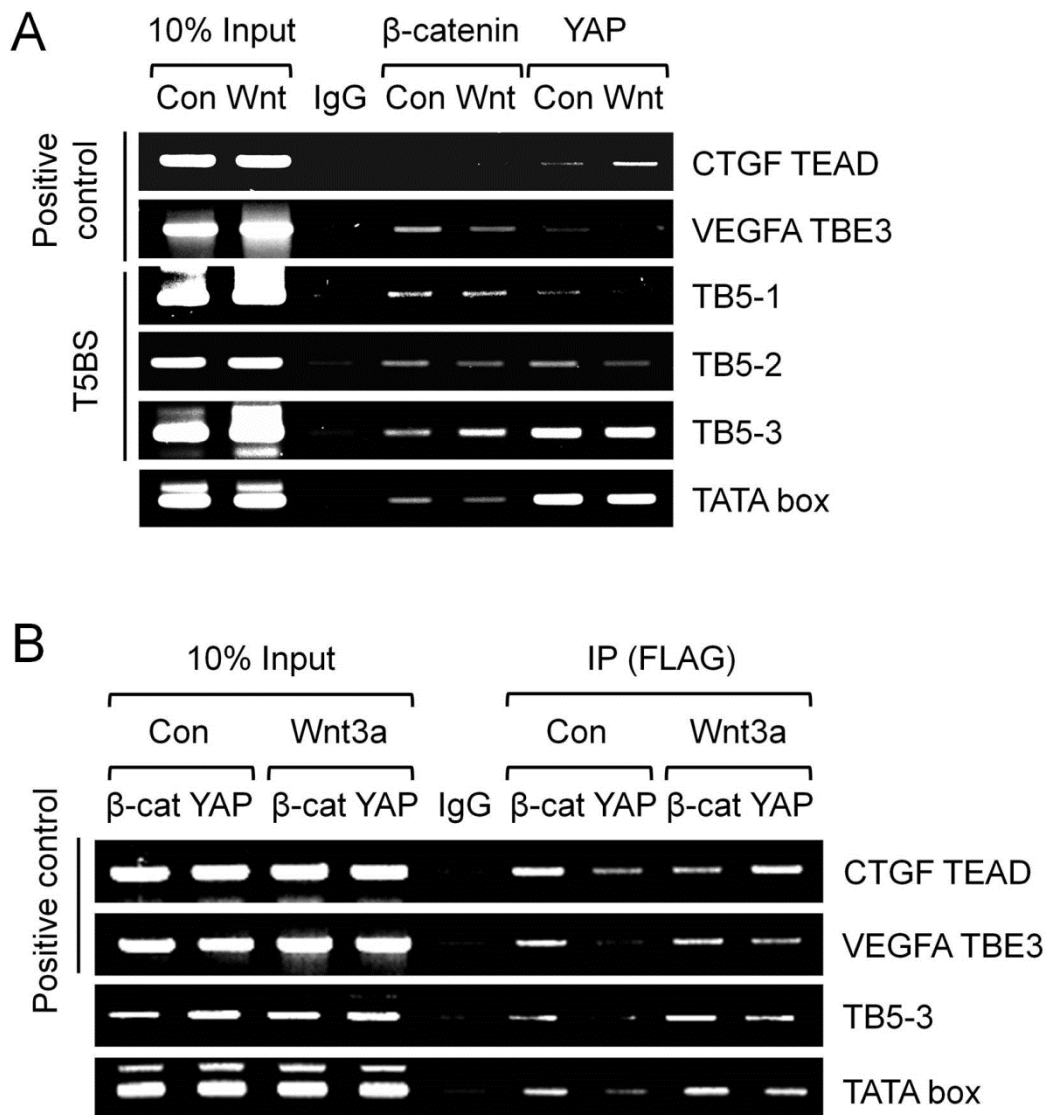

**Supplementary Figure 3.  $\beta$ -catenin and YAP associate to TBX5 binding sites and TATA box of *RMRP* promoter.**

(A) Chromatin immunoprecipitation (ChIP) analysis using anti- $\beta$ -catenin and anti-YAP antibodies in SW480 cells. TBX5 binding sites (TB5) and the TATA box of the *RMRP* promoter were tested for the recruitment of  $\beta$ -catenin or YAP. Recruitment of  $\beta$ -catenin or YAP is shown by ChIP on TEAD binding site in the *CTGF* promoter and on TBE3 (TCF Binding Elements 3) in the *VEGFA* promoter, respectively. (B) ChIP analysis using anti-FLAG antibodies in HEK293 cells following transfection of FLAG- $\beta$ -catenin and FLAG-YAP in HEK293 cells

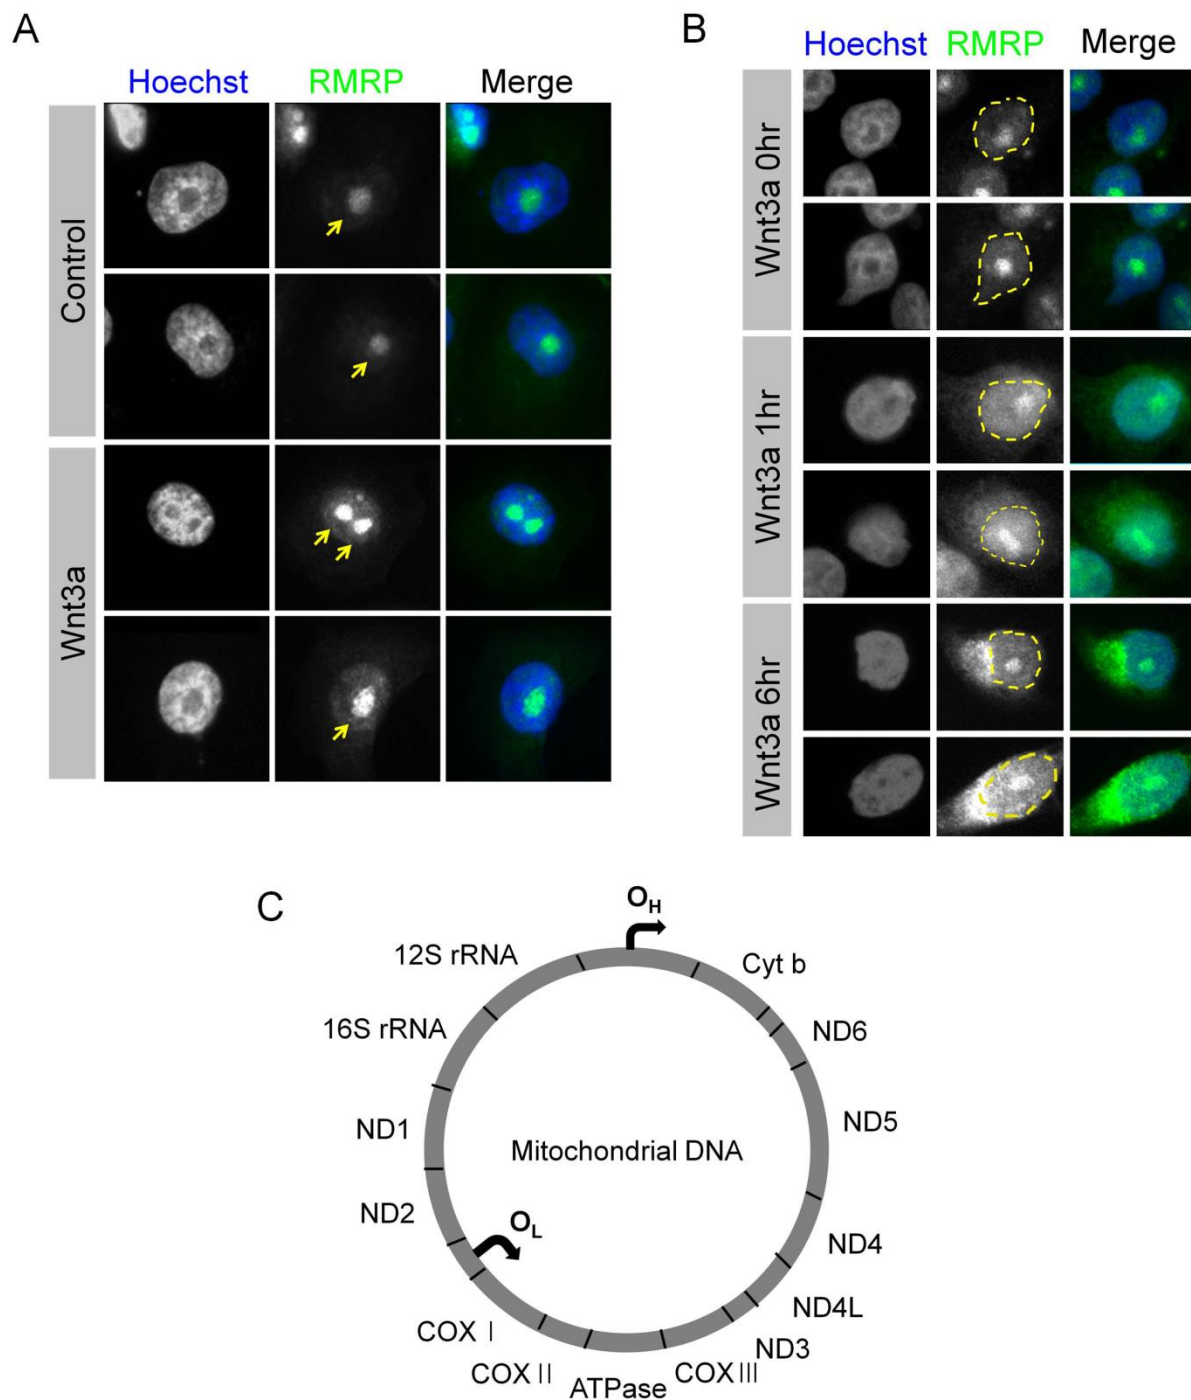

**Supplementary Figure 4. Wnt signaling could enhance mitochondrial DNA replication.**

(A) Fluorescence in situ hybridization (FISH) analysis of *RMRP* (green) after Wnt3a treatment for 1 hr in H1299 cells. Yellow arrows indicate the nucleolus of cells. (B) FISH analysis of *RMRP* (green) after Wnt3a treatment for 1 or 6 hrs in HeLa cells.

Yellow lines indicate nuclear boundaries. (C) Diagram of mitochondrial genome. PCR primers designed for 16S ribosomal RNA gene were used.
